# Supplementary material for: Comprehensive catwalk gait analysis in a chronic model of multiple sclerosis subjected to treadmill exercise training
Source: BMC Neurol. 2017 Aug 22;17:160. doi: 10.1186/s12883-017-0941-z (PMC5568395; doi:10.1186/s12883-017-0941-z)
Supplement: Additional file 1: — Raw Data. Complete list of all original data generated during this study. (XLSX 117 kb) [file 12883_2017_941_MOESM1_ESM.xlsx]

## Sheet: Plan1
Animal	Time_Point	Rotarod	Escore	Run_Duration_(s)_Mean	Run_Average_Speed_(cm/s)_Mean	OtherStatistics_Cadence	StepSequence_RegularityIndex_(%)	PhaseDispersions_RF->LH_Mean	PhaseDispersions_LF->RH_Mean	Couplings_RF->LH_Mean	Couplings_LF->RH_Mean	Support_Diagonal_(%)	Support_Lateral_(%)	Support_Three_(%)	Support_Girdle_(%)	Support_Zero_(%)	FP_StrideLength_(cm)_Mean	HP_StrideLength_(cm)_Mean	FP_BodySpeed_(cm/s)_Mean	HP_BodySpeed_(cm/s)_Mean	FP_SwingSpeed_(cm/s)_Mean	HP_SwingSpeed_(cm/s)_Mean	FP_StepCycle_(s)_Mean	HP_StepCycle_(s)_Mean	FP_Stand_(s)_Mean	HP_Stand_(s)_Mean	FP_DutyCycle_(%)_Mean	HP_DutyCycle_(%)_Mean	FP_InitialDualStance_(s)_Mean	HP_InitialDualStance_(s)_Mean	FP_TerminalDualStance_(s)_Mean	HP_TerminalDualStance_(s)_Mean	BOS_FrontPaws_Mean_(cm)	BOS_HindPaws_Mean_(cm)	FP_MaxContactMaxIntensity_Mean	HP_MaxContactMaxIntensity_Mean	FP_MeanIntensityOfThe15MostIntensePixels_Mean	HP_MeanIntensityOfThe15MostIntensePixels_Mean	FP_MaxIntensityAt_(%)_Mean	HP_MaxIntensityAt_(%)_Mean	FP_MaxIntensity_Mean	HP_MaxIntensity_Mean	FP_MaxContactAt_(%)_Mean	HP_MaxContactAt_(%)_Mean	FP_PrintWidth_(cm)_Mean	HP_PrintWidth_(cm)_Mean	FP_PrintLength_(cm)_Mean	HP_PrintLength_(cm)_Mean	FP_PrintArea_(cm²)_Mean
EAE1	Basal	360	0	1.32818	23.6484	15.702	100	-2.20918	-1.35796	96.1962	96.9539	73.0496	0	22.695	1.41844	0	5.9278	6.04959	24.4036	25.6229	53.6694	63.9038	0.250651	0.23514	0.132657	0.136234	54.5694	58.7473	0.00790059	0.0250173	0.0152665	0.0233497	1.55786	2.7057	215.259	226.385	194.953	223.277	27.7569	71.9003	224.741	242.423	36.513	29.5867	0.710267	0.737585	0.778128	0.861441	0.283364
EAE2	Basal	360	0	1.61431	24.0807	15.7424	97.7778	5.2259	4.3473	103.016	105.204	54.1872	0	38.4236	0	0	5.50894	5.49024	23.5003	23.0878	55.8814	66.064	0.244272	0.25182	0.145863	0.158754	57.7619	64.2538	0.0255249	0.0385591	0.0245252	0.0425544	1.4039	2.87089	222.393	229.893	207.407	225.39	31.5282	68.2017	230.107	240	40.142	29.0939	0.727848	0.804702	0.869761	0.887787	0.347688
EAE3	Basal	335	0	1.34122	25.8795	16.1518	94.1176	4.04558	8.07453	101.505	70.7349	80.9524	0	14.966	0	0	6.22276	5.9072	25.844	26.2089	59.0769	60.5195	0.232829	0.222177	0.126174	0.127783	54.2686	55.8629	0.011235	0.0177332	0.0112293	0.0171403	1.42384	2.54051	219.32	227.36	201.829	224.284	36.0501	68.179	228.56	242.28	39.9093	23.6311	0.734177	0.78481	0.820189	0.893375	0.314659
EAE4	Basal	360	0	1.59635	23.569	13.3617	97.9592	-1.06314	7.39085	96.2822	105.545	60.1594	1.19522	28.6853	3.18725	0	5.72231	5.59948	21.5879	21.3835	51.6319	54.6533	0.275027	0.281176	0.163939	0.162945	57.7205	59.7756	0.0275483	0.0356456	0.0337165	0.0346993	1.36021	2.45453	216.448	222.793	208.52	221.453	25.3326	74.0055	224.138	240.345	32.7977	26.9908	0.739852	0.811873	0.872403	0.872403	0.364063
EAE5	Basal	253.667	0	1.52201	21.6939	13.732	97.561	8.22938	4.18126	105.838	104.247	60.2273	0	32.9545	0	0	5.60556	6.08901	20.5935	21.6773	54.2896	58.3266	0.270409	0.288649	0.165291	0.176602	58.7878	62.6871	0.0271929	0.0399751	0.0288545	0.0312222	1.40986	2.3579	222.308	229.208	215.028	230.05	27.2045	75.268	232.538	242.125	38.0958	26.7799	0.716999	0.825617	0.900267	0.998948	0.412521
EAE6	Basal	360	0	1.86683	19.0938	13.8811	98.1132	-6.58446	13.2543	95.5435	43.8484	48.9712	0.411523	39.5062	1.64609	0	5.00472	4.70488	18.6904	18.6316	47.6013	54.1455	0.291987	0.26768	0.165142	0.170329	58.9402	63.685	0.0227082	0.043936	0.0261999	0.04435	1.30446	2.3443	215.097	222.812	209.219	218.596	36.2283	64.6797	229.645	236.312	36.8735	30.2813	0.714855	0.74267	0.814084	0.873423	0.364579
EAE7	Basal	360	0	1.36509	26.4212	13.6759	91.4286	6.2751	12.1161	102.631	45.3462	69.2913	1.5748	24.4094	0.787402	0	6.66486	5.52868	25.0761	24.0313	60.7591	56.4927	0.260589	0.244127	0.148292	0.144386	56.4422	58.9323	0.019952	0.0205866	0.0193346	0.027464	1.38889	2.43984	221.792	225.68	216.783	223.467	22.4243	63.8708	234	241.32	42.8679	25.4785	0.753601	0.748148	0.909569	0.812618	0.423369
EAE8	Basal	354	0	1.36057	27.3813	12.7334	100	-1.19425	5.09058	96.7321	104.333	61.4173	0.787402	20.4724	3.14961	0	7.06245	7.23999	26.3801	25.9368	66.4626	66.8771	0.284783	0.253646	0.165254	0.148121	58.501	56.0935	0.0249702	0.0221319	0.0249811	0.0235595	1.57852	2.37795	219.818	232.227	219	234.867	41.445	65.4671	233.727	244.818	31.6672	23.8786	0.780022	0.824916	0.934901	0.966447	0.444685
EAE9	Basal	360	0	1.40208	25.4826	16.6732	97.561	9.02664	7.67087	104.716	64.2501	68.595	0	23.1405	0.826446	0	5.97479	5.61201	24.5048	23.7752	56.7758	58.1264	0.238752	0.219949	0.133951	0.131516	55.9238	54.7159	0.0164691	0.0205689	0.012944	0.0211179	1.29451	2.7898	216.72	222.308	202.947	218.276	25.1101	65.1973	227.44	237.538	36.4439	24.2092	0.729114	0.774099	0.850473	0.856588	0.339895
EAE10	Basal	360	0	1.22071	29.14	15.4624	94.1176	1.47059	97.4628	101.574	97.2882	83.0189	0	11.9497	1.25786	0	7.19925	6.59467	28.4705	26.9647	61.2255	57.1193	0.253897	0.240297	0.134776	0.125027	51.2373	50.3898	0.00996868	0.00798261	0.0106825	0.00665296	1.55735	2.44519	218.773	222.087	206.261	217.584	31.7463	69.4682	227	235.217	37.5384	28.8498	0.745109	0.668685	0.894615	0.780947	0.398731
EAE11	Basal	332	0	1.35226	24.2109	14.0953	97.561	5.70246	8.9881	105.702	107.559	62.2222	0.740741	33.3333	0	0	6.42481	6.12671	23.3144	22.5197	61.0863	58.0108	0.260306	0.255965	0.156259	0.147883	58.4645	59.8653	0.0233156	0.02221	0.0246491	0.0227679	1.3963	2.34218	216.13	221.885	201.849	211.474	31.8888	57.2451	222.696	230.077	29.8279	30.1207	0.748487	0.676728	0.927721	0.77903	0.406984
EAE12	Basal	360	0	0.84212	41.3761	19.6378	92.3077	0.84058	80.9524	102.785	81.4603	81.3953	0	0	4.65116	0	7.84106	7.31444	40.082	38.2975	85.9517	67.936	0.194997	0.182951	0.100234	0.080196	50.945	42.6981	0.00637023	0.000832677	0.00455052	0.000832677	1.39962	2.84916	219.579	220.3	208.996	211.352	43.4886	56.5036	231.053	229.95	44.5528	26.0873	0.772818	0.636076	0.915186	0.859873	0.419253
EAE-Ex1	Basal	360	0	2.81062	17.24	8.8399	67.7966	19.4435	11.123	37.4992	31.7532	21.9262	0	32.9918	2.66393	0	4.01521	3.75946	12.7666	12.8904	45.935	40.4768	0.398117	0.397888	0.298131	0.291002	73.8947	71.2895	0.110008	0.115979	0.116417	0.125981	1.62783	2.9161	218	229.368	208.609	223.597	43.9281	47.7069	232	237.711	40.9518	23.265	0.745809	0.711193	0.832126	0.725552	0.336394
EAE-Ex2	Basal	249.333	0	1.47629	24.4214	13.5943	100	0.470899	2.57576	98.2086	101.16	77.6786	0	11.6071	0.892857	0	5.95589	6.5443	23.6523	26.0956	55.2429	64.9715	0.2659	0.228411	0.143723	0.135343	56.4844	55.2368	0.0216426	0.0135558	0.0149774	0.0164123	1.46698	1.88435	219.769	223.5	200.146	223.239	22.0444	62.008	231.923	241.091	34.9589	18.0155	0.703505	0.802647	0.800777	0.866074	0.308546
EAE-Ex3	Basal	360	0	0.797392	41.3913	20.4643	100	1.85185	-4.375	99.537	93.0589	84.4828	1.72414	5.17241	0	0	7.72651	7.6183	40.6641	39.1964	82.3702	84.8082	0.186396	0.185559	0.0892649	0.0937809	48.2937	51.037	0.00167065	0.0050159	0.00167065	0.00334327	1.03112	2.34388	217	225.15	207.69	227.017	17.5753	74.5393	224.65	244.9	27.5871	27.3719	0.772152	0.712025	0.886435	0.84858	0.375754
EAE-Ex4	Basal	343	0	1.65717	22.1418	11.6294	97.2973	-2.6242	2.96618	96.2342	97.9325	44.4444	0.653595	22.8758	0	0	6.06364	5.91522	21.2078	19.4439	51.9696	59.3231	0.311869	0.335407	0.184663	0.20393	56.3284	64.4367	0.0374096	0.0609715	0.0351849	0.0589631	1.14039	2.42172	222.346	232.87	221.321	238.559	26.9986	59.3349	234.269	245.348	32.9356	21.2714	0.783476	0.802469	0.956079	0.993005	0.468842
EAE-Ex5	Basal	360	0	1.45966	25.0059	15.6381	100	4.88507	1.49074	102.306	101.049	56.9231	0	28.4615	2.30769	0	6.20049	5.93284	25.4048	23.5727	61.8132	67.7363	0.238776	0.244891	0.142465	0.158046	56.0584	63.0687	0.0181474	0.0342209	0.0194077	0.0383201	1.53569	2.52574	217.958	229.88	206.061	228.291	24.3303	66.0209	229.792	240	31.3874	23.6322	0.796414	0.83038	0.893796	0.888328	0.372193
EAE-Ex6	Basal	360	0	1.3799	27.5814	13.8104	100	8.48001	6.84921	107.269	103.719	47.7064	0.917431	44.0367	0	0	6.41818	6.43174	26.0444	25.8448	60.9497	63.8347	0.287138	0.283159	0.169865	0.169882	59.5768	60.7541	0.0339091	0.0365753	0.0319179	0.0359119	1.32716	2.13097	228.348	234.957	219.623	238.786	19.302	67.1396	239.261	246.522	30.8282	22.9663	0.815888	0.85883	0.943629	0.932657	0.465482
EAE-Ex7	Basal	298.333	0	1.12468	32.0808	16.9959	100	2.34375	3.14992	99.3034	103.15	78.7037	0	14.8148	0	0	7.30816	7.25791	31.7838	30.0191	71.7275	67.8612	0.22858	0.235025	0.125418	0.126791	52.3021	52.0036	0.0121022	0.0106849	0.0113906	0.0113965	1.13309	1.92153	221.636	228.409	211.812	233.867	18.1505	69.1001	231.818	245.636	31.9581	23.5787	0.808081	0.872615	0.911959	0.920562	0.439374
EAE-Ex8	Basal	360	0	1.53369	21.6553	11.5645	100	-0.495338	-7.07771	96.2109	96.0512	65.7143	3.80952	20	0.952381	0	7.20027	7.15369	21.6289	22.3324	45.3427	54.8554	0.37034	0.347201	0.18374	0.197599	54.1574	60.1872	0.0177915	0.0371542	0.0129294	0.0255855	1.01117	2.04243	219.905	226.048	216.254	235.222	30.1801	68.7258	231.619	245.619	36.8089	24.5497	0.781893	0.770135	0.91032	0.886285	0.445275
EAE-Ex9	Basal	354	0	1.15781	42.6598	19.0704	96.9697	0.237069	0.586784	100.39	101.176	75.6098	1.21951	20.7317	0	0	7.56623	7.58121	38.9439	37.7007	84.2368	80.0688	0.208788	0.214651	0.109722	0.112203	51.6735	51.1495	0.0116411	0.0116323	0.00747947	0.00914059	1.21759	2.21193	218.9	226	213.843	232.803	21.495	65.7662	229.65	246.1	35.3209	24.9526	0.82716	0.70679	0.946372	0.864353	0.443588
EAE-Ex10	Basal	360	0	1.61644	33.5624	11.1897	92.3077	-1.05181	13.706	95.6787	108.096	27.6471	0	51.7647	0.588235	0	6.72456	4.98175	28.8602	25.1032	59.1665	53.5185	0.32866	0.332266	0.204997	0.198193	56.5929	67.8314	0.0393448	0.0656437	0.0572216	0.0689795	1.0153	1.80298	219	220.296	207.958	213.592	30.1696	60.8497	228.773	236.37	31.9071	20.1602	0.802647	0.801688	0.885929	0.830385	0.422002
EAE-Ex11	Basal	360	0	1.46649	22.0349	15.6812	97.7778	-4.20875	97.2331	95.011	97.075	71.7822	1.48515	22.2772	0.990099	0	5.80041	5.6787	22.769	21.6516	51.5817	57.274	0.242388	0.242866	0.131943	0.150781	52.4212	58.1399	0.0100252	0.0256158	0.00884544	0.0256208	1.35949	2.14216	214.28	224.038	205	226.31	28.0682	70.1736	226.6	244.462	35.0021	35.242	0.739241	0.657254	0.850955	0.805977	0.398129
EAE-Ex12	Basal	360	0	1.37556	23.3192	13.9145	100	7.42617	-5.27838	106.913	97.308	76.6917	0	18.797	0	0	6.4277	6.37699	24.4316	24.5284	58.3251	59.7988	0.258085	0.259943	0.150353	0.155783	55.783	57.3897	0.0125223	0.0225673	0.01692	0.0263392	1.24319	2.1286	219.042	226.833	207.961	231.808	27.7435	74.5302	226.958	241.958	35.1669	30.2763	0.785865	0.738397	0.899682	0.854565	0.426644
EAE1	5dpi	296	0	1.40627	26.1047	13.0274	100	-4.19118	-6.97654	98.5714	95.8305	79.6875	1.5625	7.8125	0	0	7.65654	7.66097	25.2465	24.531	50.906	48.0644	0.293573	0.303766	0.141654	0.13773	47.5497	45.8753	0.00271722	0.00229918	0.00271722	0.00229918	1.11856	2.59194	205.158	215.476	177.526	193.975	32.5412	66.8494	209.105	227.19	43.2451	33.0995	0.71592	0.553091	0.811747	0.755337	0.282224
EAE2	5dpi	360	0	1.86699	18.4437	12.6729	90.9091	1.72637	7.45102	102.322	106.321	63.7631	1.0453	19.1638	1.74216	0	4.99033	5.03894	17.434	17.8391	44.0426	41.5011	0.307832	0.299869	0.181568	0.174437	60.4317	56.3484	0.0365994	0.0271053	0.0375546	0.0314035	1.3147	2.44356	211.31	216.966	194.402	206.462	43.2227	75.3769	216.69	231.034	39.9485	36.6514	0.676804	0.651103	0.825857	0.791266	0.336106
EAE3	5dpi	360	0	1.95596	26.5947	13.513	97.561	4.20006	2.56489	100.698	102.047	60.2564	0	23.5043	0	0	6.10504	6.06004	24.4888	23.298	55.5729	55.7158	0.292822	0.287681	0.158119	0.166044	55.1316	57.0004	0.025631	0.0305712	0.0218839	0.018904	1.429	2.54758	214.292	220	197.683	211.869	40.9504	66.7685	223.75	235.962	34.5981	29.3496	0.706522	0.635452	0.830721	0.793345	0.292224
EAE4	5dpi	360	0	1.14156	34.5069	17.1959	97.2973	-2.05549	-1.23106	97.6777	100.427	79.3103	3.44828	15.5172	0	0	6.80213	6.65964	31.2126	32.1418	65.8733	68.2738	0.225467	0.225674	0.114105	0.114337	48.3421	52.0134	0.00879047	0.0118094	0.00746209	0.0110684	1.03767	2.10416	209.435	212.619	183.603	193.111	30.226	68.5911	214.783	228.857	34.3296	30.5157	0.696732	0.591541	0.820499	0.737423	0.273438
EAE5	5dpi	360	0	1.46165	24.744	17.1062	97.9592	-0.477513	-7.99314	98.9587	93.0384	74.7368	1.05263	19.4737	0.526316	0	5.6614	5.70347	24.44	24.3829	53.5928	61.5587	0.232636	0.231877	0.121846	0.134207	52.6031	58.1149	0.00999263	0.023484	0.00888063	0.0209858	1.1579	2.39734	211.308	219.143	194.726	216.679	37.2583	73.5225	218	237.714	35.7823	29.0173	0.720545	0.759494	0.795923	0.822443	0.307778
EAE6	5dpi	360	0	1.79644	33.2724	13.9885	96.2963	-1.23148	18.1399	101.245	73.9351	26.5873	0.396825	46.4286	3.57143	1.98413	4.54788	4.61235	23.1948	22.4828	47.9029	53.8677	0.279707	0.308824	0.160978	0.199721	58.17	65.1602	0.0313312	0.0709757	0.0361289	0.0809995	1.25153	2.67028	208.968	224.567	192.728	219.909	23.4819	71.1299	217.258	239.533	38.5016	38.4258	0.671703	0.751055	0.722499	0.815983	0.284285
EAE7	5dpi	360	0	1.77241	24.1627	13.5054	90.9091	12.775	-0.514522	42.4612	99.7833	63.7555	0	22.2707	0.873362	0	5.38111	5.16577	20.3575	20.0461	45.7591	48.1358	0.285496	0.289157	0.162124	0.185174	56.7176	60.0745	0.0225646	0.0368933	0.0225644	0.0428719	1.12068	2.3686	213.667	221.536	197.719	220.467	32.19	70.9375	222.074	241.786	41.9998	31.9541	0.700891	0.716546	0.733731	0.824696	0.298598
EAE8	5dpi	360	0	1.01355	33.0095	18.8163	100	0.507004	1.43939	72.7257	97.8298	82.0896	7.46269	2.98507	1.49254	0	7.32394	6.75308	32.2401	31.5758	66.9047	62.4058	0.216335	0.197295	0.105804	0.0982512	48.7645	46.9334	0.00153846	0.00231343	0.00230584	0.00461168	1.30048	2.52206	210.476	214.818	188.003	197.812	30.2069	55.3542	211.524	224.318	28.9445	37.6277	0.696203	0.595512	0.838215	0.72842	0.304429
EAE9	5dpi	360	0	1.6539	20.1337	11.9676	86.9565	4.35762	4.1706	72.9788	75.8519	70	1.25	15	1.25	0	5.77612	5.56876	19.6432	19.0907	53.6873	37.481	0.309789	0.280303	0.171751	0.125909	57.9093	49.7227	0.0254332	0.0180385	0.0184524	0.0161402	1.05609	2.88734	209.286	213.172	187.176	188.91	36.913	64.0762	211.964	221.517	40.8696	34.3297	0.718722	0.548297	0.790416	0.61615	0.30736
EAE10	5 dpi	360	0	1.53897	20.4624	14.4788	93.0233	3.2447	16.8584	101.527	58.9466	74.5946	1.08108	12.4324	2.16216	1.08108	5.85957	5.854	21.2448	20.3415	50.1543	82.319	0.257267	0.251902	0.14332	0.14437	53.2618	55.1693	0.0106388	0.0205781	0.010011	0.0194661	1.13416	1.87351	219.36	228.154	215.709	234.808	25.503	72.3517	230.56	245.731	35.0814	29.5303	0.737888	0.766842	0.888328	0.890561	0.397045
EAE11	5 dpi	360	0	1.84948	17.9504	12.838	96	1.91973	0.659786	98.2815	100.364	59.6667	1	21.6667	0.333333	0	4.91713	4.91944	17.4412	17.4524	42.4755	47.7434	0.288423	0.297814	0.173089	0.188272	57.9494	63.0049	0.0318957	0.0451129	0.030531	0.0459456	1.13509	2.54982	217.2	230.812	208.138	237.037	25.3968	74.8853	228.667	244.938	43.1114	30.2895	0.695652	0.762811	0.763407	0.891167	0.324732
EAE12	5 dpi	200	0	1.18106	29.7798	18.1616	97.2973	96.0781	5.72478	95.4346	102.806	81.746	3.1746	8.73016	0	0	6.3451	6.04421	28.8393	28.6346	63.8152	61.988	0.217705	0.200003	0.113134	0.103503	52.9758	50.5471	0.00767081	0.00530808	0.00707941	0.00589805	1.07329	2.4954	214.52	226.24	207.067	227.749	22.7492	70.4462	222.8	241.36	31.393	40.2139	0.747826	0.66087	0.858044	0.815142	0.372279
EAE-Ex1	5 dpi	360	0	1.29224	32.076	16.9956	93.617	-1.68144	4.01641	98.5019	78.7581	56.383	1.06383	31.383	1.06383	0	5.53267	5.00698	30.7908	28.0862	78.1368	75.4473	0.232142	0.220737	0.128982	0.12277	54.1224	56.9917	0.013714	0.0267537	0.0136588	0.0244819	1.11173	2.53589	209.714	216.6	187.467	200.568	26.0142	65.6997	213.071	228.533	41.5607	39.8447	0.720941	0.571429	0.741155	0.716823	0.303744
EAE-Ex2	5 dpi	220.5	0	0.704388	46.5379	24.8657	96.9697	-1.66667	-1.60714	96.2622	99.0179	90.7407	1.85185	5.55556	1.85185	0	7.50094	7.45157	45.4715	44.3356	89.0187	87.7904	0.156054	0.163736	0.0747008	0.0799335	45.083	47.5829	0.000768776	0.00230425	0.0015352	0.00460588	1.25456	2.028	206.667	215.714	183.857	210.349	26.181	64.2094	211.667	240.381	29.7959	25.3216	0.715765	0.627033	0.809076	0.785192	0.30838
EAE-Ex3	5 dpi	360	0	1.12716	58.0513	22.7855	100	1.96078	-22.549	95.5637	100						8.35202	7.9581	51.8842	44.2842	134.256	139.082	0.148472	0.153611	0.076614	0.0874079	42.4677	46.8752	0	0.00147342	0.000908905	0.00299009	1.08205	2.21837	212.421	217.824	193.579	210.8	17.5213	63.5453	216.842	237.176	23.7015	19.865	0.771494	0.646693	0.848045	0.785543	0.314402
EAE-Ex4	5 dpi	360	0	0.75349	43.306	22.3188	96.9697	-4.96032	3.27485	95.1852	102.157	83.5616	0	6.84932	4.10959	0	7.50924	7.52477	41.7549	40.2607	82.7344	82.0131	0.175689	0.177254	0.0840854	0.0836082	47.6283	47.7973	0.00155914	0.00390106	0.00311555	0.00311827	1.05146	2.20398	210.952	219.619	192.556	217.248	31.1494	66.9407	213.762	240.143	29.8571	25.6217	0.79858	0.600414	0.865801	0.755337	0.311533
EAE-Ex5	5 dpi	360	0	1.37672	34.0185	15.6335	93.617	88.2992	14.316	91.1447	64.0264	56.1321	0	28.7736	2.35849	0.943396	5.69979	4.99512	26.642	23.7262	59.1813	58.2477	0.270243	0.2393	0.136819	0.140781	53.3161	57.5349	0.0153497	0.0353603	0.0135738	0.0300963	1.16502	2.30245	212.24	220.069	198.373	211.611	40.5196	64.8526	218.36	235.31	37.795	33.6995	0.701266	0.670013	0.792429	0.778853	0.312423
EAE-Ex6	5 dpi	360	0	0.920867	36.0548	20.5457	100	5.18116	-7.67045	104.441	94.5617	81.3953	2.32558	11.6279	2.32558	0	6.92481	6.91718	35.3594	33.8422	73.3086	74.2956	0.195478	0.198363	0.0992501	0.102456	50.1556	51.8586	0.00575227	0.00790745	0.00575366	0.00574908	1.24281	2.23101	220.636	224.909	207.461	225.867	20.487	67.6832	226.5	242.545	25.2374	31.812	0.791139	0.664557	0.903355	0.797247	0.380074
EAE-Ex7	5 dpi	360	0	1.8272	24.3589	13.0444	96	-1.4132	92.9398	97.6005	95.3794	74.3902	0	16.2602	0	0	5.48408	5.48808	20.3467	19.4097	42.7408	47.0455	0.307617	0.306289	0.161568	0.172905	52.9	57.3351	0.0162209	0.0291187	0.0137371	0.0189187	1.15383	2.12869	203.345	215.367	173.432	203.284	44.2464	65.5045	209.793	226.467	41.1886	36.8407	0.683108	0.654008	0.650495	0.801262	0.21976
EAE-Ex8	5 dpi	360	0	1.73945	18.772	14.3594	86.9565	15.9209	7.34047	63.7943	59.3431	71.0638	0.851064	11.4894	2.55319	0	5.79209	4.46156	19.6831	19.8752	51.0911	41.729	0.285423	0.207734	0.164146	0.129115	59.0097	50.207	0.0183223	0.0139949	0.0183177	0.0231961	1.06337	2.43713	212.385	206.143	196.508	189.336	34.5915	64.2655	217.115	224.743	37.4126	40.8679	0.740019	0.459313	0.776511	0.632717	0.309161
EAE-Ex9	5 dpi	360	0	1.58571	24.5124	13.2611	100	100.057	-5.78528	99.905	98.389	52.1472	0	33.1288	1.22699	0	5.48176	5.76149	21.5854	21.7896	46.4428	47.9439	0.298229	0.309623	0.153898	0.164164	54.044	54.6906	0.0200271	0.0371933	0.0131102	0.0371933	1.25527	2.16909	207.154	214.815	182.051	203.257	35.9023	71.8135	212.077	233.778	37.327	40.213	0.70594	0.5579	0.744965	0.757098	0.26155
EAE-Ex10	5 dpi	360	0	1.52678	20.0019	12.5277	94.7368	-0.0760234	-1.7459	100.823	100.6	71.9828	0	23.7069	0	0	6.17648	5.88307	21.2221	20.4503	53.5969	56.6871	0.302025	0.296947	0.180107	0.190149	57.4782	62.0073	0.0212405	0.0456826	0.0224179	0.036213	1.02919	1.98216	221.68	229.269	220.421	237.464	20.7758	78.9435	233.32	245.731	29.3911	22.8194	0.77764	0.805065	0.898423	0.931813	0.419774
EAE-Ex11	5 dpi	360	0	1.07269	30.7045	17.7822	100	-2.90476	6.9397	95.562	107.981	82.5688	1.83486	11.9266	1.83486	0	6.45659	6.49362	29.9336	29.4798	68.3284	62.4461	0.213806	0.211526	0.116551	0.107281	54.3767	49.3907	0.0112558	0.00600523	0.0144027	0.00468958	1.14238	2.1136	219.833	225.652	211.203	229.736	18.4136	70.378	232.208	242.478	30.8547	30.9083	0.776398	0.634621	0.851735	0.809217	0.375381
EAE-Ex12	5 dpi	360	0	1.04999	29.5958	18.5331	92.3077	1.92308	-1.90079	101.385	96.3895	76.1194	2.23881	14.1791	0.746269	0	5.95628	6.37634	26.325	26.2352	62.0332	64.1121	0.20413	0.220651	0.112389	0.115848	53.3352	54.2791	0.0111637	0.0150112	0.0111619	0.0100026	1.04638	1.75725	213.28	226.042	203.163	231.017	31.8602	71.503	222.12	244.542	32.8893	34.1241	0.732919	0.711698	0.797476	0.86225	0.335756
EAE1	12dpi	145.333	1.5	1.25432	26.5785	15.6999	100	16.2567	-10.9822	116.852	86.9967	67.5926	1.85185	22.2222	0.925926	0	6.154	6.0389	26.2008	25.3853	54.4557	59.7408	0.255112	0.259003	0.131063	0.130206	50.8159	51.3051	0.012606	0.0164401	0.00919049	0.0177706	1.28645	1.66473	211.583	214.292	187.225	198.897	25.6665	53.913	218.208	226.292	27.4942	33.3616	0.732402	0.659938	0.752351	0.786311	0.25312
EAE2	12dpi	82.6667	0	1.28597	25.5572	15.5375	100	0	8.49537	98.1806	107.153	77.5862	0	20.6897	1.72414	0	6.30769	6.33649	25.376	25.1973	66.7087	63.7925	0.256433	0.262966	0.133994	0.145725	54.4711	55.7377	0.0119324	0.0232833	0.0119324	0.0226528	1.32829	2.1614	217.5	222.75	198.736	217.361	15.2912	52.5663	223.75	235.583	21.1778	17.4101	0.688406	0.68323	0.80721	0.80721	0.305854
EAE3	12dpi	12.6667	2.5	3.34807	9.49002	6.35427	0		50		50						3.243	3.37734	8.94432	8.7504	37.96	10.4997	0.345607	0.388808	0.263132	0.0648013	69.7601	16.9075	0.0840017		0.0864017		2.02692		201.091	133.75	159.612	110.818	41.5331	37.5	209.727	138.5	43.9395	20.8333	0.564653	0.295031	0.60986	0.266458	0.147978
EAE4	12dpi	360	0	1.14991	36.3781	21.4974	96.9697	3.33333	-6.25	99.6296	95	60	0	0	6.66667	6.66667	7.28073	7.19429	33.5074	33.8824	72.8055	89.6123	0.192335	0.192016	0.0824996	0.100798	45.303	50.2747	0.00365876	0.00695421	0.00365876	0.00347711	1.14253	2.10096	208.368	214.905	172.491	183.087	12.2807	30.1587	208.421	219.81	14.9123	13.0952	0.660347	0.520556	0.722653	0.668757	0.215613
EAE5	12dpi	360	0	1.24803	23.8381	15.7384	94.7368	-4.01709	0.458365	99.0581	97.1569	78.9474	0	14.0351	0	0	6.09397	5.90891	27.4356	24.9103	73.7073	54.5703	0.222498	0.235346	0.123623	0.127139	49.788	47.8784	0.00786046	0.0111408	0.00912996	0.0112219	1.27516	2.51855	209	215.667	185.685	200.564	31.3571	64.1964	210.6	224.792	29.6524	27.0238	0.680745	0.662526	0.805016	0.781087	0.301252
EAE6	12dpi	307.667	1	2.10641	30.6846	13.7727	90.566	97.1891	2.20872	99.4472	100.571	60.396	0	28.7129	1.9802	0	4.28649	4.36618	21.0018	23.5687	44.7209	50.9284	0.283196	0.280243	0.153895	0.16421	57.5976	59.6185	0.0290423	0.0297245	0.0151744	0.0528864	1.13219	1.79302	193.182	206.735	149.921	182.4	46.3985	54.4541	197.515	214.794	35.5099	35.7623	0.611707	0.64304	0.579462	0.739443	0.171697
EAE7	12dpi	15.3333	2	2.47848	12.6417	11.4959	82.5397	9.62269	16.2149	56.2313	59.4973	61.5152	2.12121	10.303	10.9091	0	4.72572	3.7806	12.7912	12.6551	33.1954	21.9785	0.354878	0.296812	0.20331	0.118572	54.892	43.0085	0.0183757	0.00964953	0.036332	0.00932779	1.4664	2.78377	200.121	152.195	161.448	128.603	35.6628	52.0757	204.727	164.195	34.7685	32.6617	0.560888	0.348432	0.670656	0.351709	0.19518
EAE8	12dpi	26.3333	3	2.733	11.2982	6.05453	0										4.08426		11.3078		31.6536		0.34375		0.170489		50.682		0.0204055		0.0189206		2.03201		150.919		126.269		54.7924		165.973		37.8899		0.407923		0.465983		0.094828
EAE9	12dpi	360	1	1.89308	18.6131	13.0903	95.6522	97.8968	14.409	97.6609	52.835	68.0412	1.03093	21.134	0	0.515464	5.53285	5.30958	18.268	17.3085	52.0164	49.7115	0.288208	0.286388	0.167827	0.161203	56.643	57.9207	0.019212	0.0211582	0.021614	0.0218108	1.26907	2.28511	208.074	216.069	190.953	211.179	39.8524	71.8734	214.37	235.483	33.1959	27.3765	0.729239	0.646819	0.822013	0.77397	0.294946
EAE10	12 dpi	271	0	1.16725	35.4129	15.052	97.2973	-0.327381	-2.47162	98.9181	99.4054	80.597	2.23881	12.6866	0	0	7.03412	7.20321	30.5694	31.0008	65.0566	62.608	0.267359	0.255138	0.13533	0.121084	54.4312	50.4996	0.0139557	0.00640608	0.00930711	0.00355893	1.09265	1.96684	222.609	228.045	215.023	232.215	23.706	72.1082	233.652	244.182	33.7414	27.3489	0.790265	0.809034	0.872317	0.868815	0.403769
EAE11	12 dpi	311.5	0	1.87821	16.1824	12.7661	100	-0.157967	7.85673	98.9495	106.984	68.9655	0	18.1034	0	0	5.14718	4.99421	17.2629	16.2946	44.3128	41.7449	0.284987	0.289419	0.174259	0.171731	58.1553	57.8954	0.0234135	0.0242542	0.0247633	0.0272975	1.00716	2.21661	216.533	231.5	210.162	236.745	27.6612	62.36	226.6	245.143	31.1829	27.7231	0.781971	0.916442	0.757384	0.924503	0.370857
EAE12	12 dpi	305.5	0	1.22502	25.3178	17.4631	97.2973	3.99856	5.37622	102.125	102.764	75.817	0.653595	18.3007	0.653595	0	5.60487	5.64403	25.7145	25.6932	56.645	59.6263	0.21704	0.214416	0.115006	0.113914	53.8662	55.4674	0.00850858	0.01329	0.0100939	0.0132877	1.05948	2.26143	215.444	233.704	208.378	236.146	18.2626	71.2573	228.259	245.593	33.2021	26.9499	0.768693	0.822269	0.738397	0.909517	0.335548
EAE-Ex1	12 dpi	117.333	0.5	2.65541	13.5107	8.74636	97.7778	-0.309982	21.1491	99.2651	29.9103	52.8889	0	39.5556	0	0	5.30945	5.07602	13.161	13.0088	36.1213	38.8666	0.447329	0.423706	0.28051	0.296182	62.7377	64.7918	0.0713734	0.083572	0.0657024	0.0670459	1.09779	2.01564	207.133	220.103	185.176	218.195	39.6437	73.5197	215.5	239.724	36.8359	37.4406	0.693582	0.672521	0.733542	0.802075	0.244942
EAE-Ex2	12 dpi	37.6667	2	0.998331	38.2133	25.332	97.7778	96.1762	-1.14583	97.6162	104.537	83.7209	3.48837	2.32558	1.16279	1.16279	5.58587	5.25836	40.5418	41.2624	94.2865	86.3063	0.149976	0.143039	0.0775343	0.0697236	49.7017	47.129	0.00314553	0	0.00234838	0.00181429	1.08331	2.01453	195.407	203.517	151.136	172.386	49.2952	38.3944	198.852	209.379	36.4221	24.914	0.609616	0.53973	0.587484	0.665874	0.161103
EAE-Ex3	12 dpi	286.333	0	2.66658	17.5848	11.7191	100	0.320513	3.57143	100	103.571	73.913	0	21.7391	4.34783	0	5.62764	4.04755	17.639	14.8859	50.1284	28.3765	0.264525	0.252945	0.176756	0.139847	53.8645	51.5193	0.0127996	0.0177772	0.0127996	0.0213327	1.23706	2.25673	189.286	210.667	146.952	176.437	36.8017	50.3726	192.857	225.556	29.4938	28.2474	0.505768	0.489993	0.582176	0.494601	0.131289
EAE-Ex4	12 dpi	116.333	0.5	1.92136	24.798	12.1963	95.6522	-2.25847	97.6229	99.6738	97.1583	40.8759	0	32.8467	0	0	4.84715	4.69418	22.7725	23.7108	51.3928	71.1887	0.366571	0.340711	0.225018	0.238954	55.9098	64.296	0.0641747	0.0783195	0.0627984	0.0811832	1.19246	2.41197	207.84	219.172	182.629	206.426	23.7571	58.3135	212.36	232.862	21.667	20.7688	0.670807	0.706789	0.76489	0.763161	0.266516
EAE-Ex5	12 dpi	84.3333	2	1.44053	27.5001	18.7343	100	11.777	8.53022	110.599	62.2253	57.3529	4.41176	27.9412	4.41176	1.47059	5.31422	5.33407	27.6055	25.188	72.8613	58.0308	0.187501	0.212328	0.109735	0.119032	53.3275	52.7511	0.0143974	0.0198558	0.0144288	0.0208319	1.0461	1.78964	193.714	212.517	146.893	197.816	41.3992	58.4427	200.214	228.103	27.9924	20.3068	0.652174	0.704648	0.559785	0.745865	0.166475
EAE-Ex6	12 dpi	25.3333	1	2.84532	12.9654	11.0216	16.3265	8.69565	6.87896	8.69565	50.7694	38.4615	15.3846	3.84615	0	0	2.94467	3.02383	11.2426	13.9603	21.5026	23.12	0.227144	0.232132	0.0996486	0.0753962	44.3461	42.3714	0.00751315	0	0.00780747	0.0050034	1.69436	2.35531	126.765	119.381	108.159	104.866	47.7714	39.0018	135.765	124.952	30.7637	25.3521	0.295944	0.242532	0.395845	0.253769	0.0594813
EAE-Ex7	12 dpi	137	2	2.56301	12.2803	10.5113	87.2727	0.926404	13.8137	72.4264	112.213	54.5455	2.9484	26.2899	1.2285	0	4.30795	4.40593	11.8537	11.9717	31.2333	29.9673	0.357684	0.37197	0.209354	0.207023	59.51	56.1772	0.0386475	0.0326181	0.0393379	0.0311415	1.1899	1.99976	195.135	188.429	151.692	151.482	60.2355	57.2097	202.324	201.971	55.5857	37.6209	0.585865	0.486247	0.571041	0.623377	0.153977
EAE-Ex8	12 dpi	12.3333	2	1.90159	20.0763	11.0904	71.7949	-8.24237	19.5064	90.9802	37.4544	52.1212	7.27273	33.3333	1.81818	0	4.69577	4.53538	21.4082	13.4302	72.4848	28.6999	0.298059	0.377112	0.169587	0.18805	57.2325	55.9134	0.0274873	0.0374743	0.0275688	0.0415509	1.25165	1.81085	177.844	176.286	136.434	150.151	49.8471	52.633	186.594	188	38.981	40.9583	0.498835	0.485064	0.636755	0.555307	0.126317
EAE-Ex9	12 dpi	131	0.5	1.88078	19.675	14.3352	85.1064	13.7246	11.3391	53.1307	60.417	60.8295	0.460829	23.5023	10.5991	0	5.32462	4.71012	19.5497	19.5331	43.9259	68.9435	0.301706	0.259733	0.168118	0.153181	52.2879	55.9154	0.0271229	0.0281496	0.0209361	0.0272447	1.19344	1.88765	208.448	218.2	185.051	214.739	32.9472	63.9665	217.897	237.133	37.752	28.96	0.734633	0.689441	0.709113	0.817137	0.275411
EAE-Ex10	12 dpi	28.5	0.5	2.0073	32.9641	13.4516	100	0.249797	12.0629	99.4971	108.728	46.6368	1.34529	43.0493	0.44843	0	5.64057	5.56507	30.2853	27.4364	65.8831	64.1131	0.304047	0.30689	0.165468	0.190808	55.9836	59.8387	0.0299436	0.0472625	0.0299467	0.0456943	1.16977	1.68771	213.107	219.556	194.952	220.005	35.5475	62.7817	220	236.667	37.055	19.4575	0.678347	0.805963	0.721067	0.897797	0.283474
EAE-Ex11	12 dpi	360	0	1.07279	30.6457	18.3192	95.2381	-1.85185	6.03275	99.0533	104.678	80	0.952381	8.57143	4.7619	0	6.35729	6.23794	30.6292	29.7693	66.5795	60.7059	0.208176	0.206637	0.110459	0.103299	51.9979	48.7866	0.00771372	0.00695307	0.00533577	0.00378541	1.2543	2.03747	210.4	223.292	191	229.831	23.0992	75.1159	220.32	246.042	38.9697	29.9421	0.789937	0.676101	0.731646	0.770042	0.318128
EAE-Ex12	12 dpi	13.5	2.5	3.03095	11.4531	6.98315	0	30.395		30.395							3.49488	5.11396	11.734	14.2205	66.3264	21.1851	0.318586	0.355761	0.257039	0.0679638	79.1363	23.9522	0.0964635		0.102045		2.06987		214.818	194.25	208.912	152.2	58.0905	33.9286	225.273	196.75	54.136	41.0714	0.668954	0.550314	0.840046	0.664557	0.322969
EAE1	19dpi	30	3	3.99536	9.62453	6.44356	0	58.5088		58.5088							3.3761		9.57764	5.88546	49.1083		0.343465		0.285861	0.0150967	75.7446		0.0866766		0.10518		1.86551		211.324	135	198.364	123	32.0524	0	220.919	135	43.3788	0	0.675676	0.15625	0.780214	0.125786	0.326152
EAE2	19dpi	124.5	2	2.11667	17.1295	11.0795	91.6667	12.6961	29.6695	51.4534	29.6695	64.4068	5.08475	20.904	3.9548	0	6.01371	4.38321	17.129	16.0814	40.8321	30.9471	0.366782	0.273639	0.20558	0.130513	56.5723	48.0321	0.0244092	0.011484	0.0247665	0.0154238	1.54861	2.10058	209.074	194.806	191.835	163.015	42.8554	36.3106	213.481	199.694	40.1694	29.5317	0.708333	0.46875	0.857209	0.620196	0.356831
EAE3	19dpi	20
EAE4	19dpi	3
EAE5	19dpi	41.3333	3	2.67954	13.1406	9.59578	56.1404	28.7447	24.3836	28.7447	24.3836	25.7732	5.92784	22.9381	19.5876	3.35052	4.33055	4.00263	12.0073	10.0343	43.9417	17.387	0.356752	0.379139	0.244481	0.137968	67.7048	42.6621	0.0680494	0.0107655	0.0698318	0.00319007	1.25466	1.52239	209.417	184.4	199.548	157.197	52.2877	37.0557	215.056	191.829	45.0651	15.4835	0.68668	0.452529	0.837687	0.643081	0.321052
EAE6	19dpi	308.333	2	2.29332	16.2523	11.5157	86.9565	14.5855	11.962	65.7107	46.7949	63.1783	1.16279	31.3953	0.387597	0	5.35433	4.75317	14.9575	16.3371	35.4607	42.0884	0.339812	0.301576	0.195624	0.195612	56.6052	61.9338	0.0185685	0.039613	0.0281466	0.0491819	1.70575	2.67876	210.483	222.839	190.732	212.419	35.4031	53.3603	219.517	236.516	35.7452	21.1526	0.674663	0.629132	0.655064	0.798867	0.249629
EAE7	19dpi	32.3333
EAE8	19dpi	30
EAE9	19dpi	25
EAE10	19dpi	256	1	1.0906	29.4098	19.9905	97.2973	3.74956	-5.45997	103.918	95.4912	77.381	3.57143	9.52381	3.57143	0	6.31509	6.41529	28.5958	27.9872	63.0995	64.1856	0.204727	0.205098	0.11481	0.110618	49.6843	50.401	0.00384926	0.00917304	0.00154064	0.00750196	1.43424	2.15145	219.158	232.778	216.007	236.337	25.803	62.1573	234.211	245.889	36.9696	26.9727	0.774388	0.704176	0.855472	0.814815	0.403131
EAE11	19dpi	75.5	2.5	3.51876	9.18618	7.89465	77.193	29.0414	17.7892	34.7774	117.789	44.7894	0	25.7206	18.847	0.221729	4.0902	3.73024	8.68903	8.62797	37.6607	15.9456	0.460607	0.420917	0.33828	0.169213	74.3304	39.2057	0.111235	0.00698945	0.113018	0.00565704	1.94975	3.2448	219.083	191.359	220.541	183.729	47.9564	63.6878	234.139	208.103	39.9588	22.8122	0.674098	0.516087	0.902998	0.945869	0.40497
EAE12	19dpi	332.5	1	1.03827	32.3728	16.629	94.7368	-4.53782	9.02456	98.4779	103.886	75	0	20.8333	0	0	6.89116	6.94238	31.0017	30.7842	69.7354	69.7581	0.228571	0.22588	0.123164	0.123076	54.6887	54.7814	0.012445	0.0159174	0.0108841	0.00941109	1.2203	2.46019	220.19	232.591	213.908	233.594	10.2973	55.5091	231.857	241.682	31.349	20.7005	0.767364	0.836711	0.882842	0.946609	0.401905
EAE-Ex1	19dpi	2.5
EAE-Ex2	19dpi	11.5	3	2.84428	13.867	8.16202	73.4694	25.7336	19.4789	25.7336	35.9033	46.934	6.60377	27.3585	2.83019	1.17925	5.69892	3.89191	13.1602	12.7539	34.2581	18.5803	0.516937	0.353268	0.317913	0.158059	61.4553	46.1868	0.0698447	0.0117504	0.0703393	0.0113945	1.40625	2.393	210.571	154	198.91	133.483	61.3333	48.0508	217.857	167.605	41.4058	30.1927	0.620536	0.389803	0.826595	0.521351	0.321485
EAE-Ex3	19dpi	15
EAE-Ex4	19dpi	6
EAE-Ex5	19dpi	41.3333	2.5	3.75628	9.28707	9.56416	80	32.8254	26.9081	44.6706	38.6222	17.7928	5.40541	61.4865	2.7027	0	2.93152	2.7576	9.43007	9.0081	53.9078	28.2761	0.337786	0.341679	0.266293	0.230906	79.1685	59.6286	0.0965317	0.0568144	0.0945231	0.0604917	1.43844	2.12015	211.8	196.14	201.723	174.365	53.1623	44.2706	219.76	204.38	48.835	15.8343	0.628571	0.524224	0.822571	0.743574	0.319321
EAE-Ex6	19dpi	4
EAE-Ex7	19dpi	35.3333
EAE-Ex8	19dpi	29.3333
EAE-Ex9	19dpi	29
EAE-Ex10	19dpi	17.5	3	4.06532	7.9555	5.97387	0	70.2703		81.0811							3.25413	1.93932	8.37469	10.1864	54.4019	37.3733	0.371658	0.212566	0.273181	0.189317	74.6233	53.0859	0.0808194		0.0797122		2.13376		212.333	178	208.133	155.728	14.4691	47.685	222.083	188	51.7899	51.9359	0.674098	0.828025	0.825397	1.04762	0.337681
EAE-Ex11	19dpi	363	0	1.28562	30.202	14.8418	97.561	2.34762	0.77381	100.426	100.926	76.4045	0	12.9213	0.561798	0	6.43222	6.41693	27.7223	27.4459	59.148	56.0706	0.272376	0.277986	0.148195	0.146092	55.8387	54.2261	0.0193791	0.0193742	0.0199943	0.0212465	1.2155	2.28813	222.333	227.5	213.1	230.353	18.7059	61.6863	232.042	243.833	27.5401	26.4349	0.780255	0.753715	0.843915	0.793651	0.374414
EAE-Ex12	19dpi	13.5
EAE1	22dpi	156.5	2.5	3.58154	9.02968	9.62077	57.1429	24.0731	20.8224	50.733	20.8224	35.5042	9.03361	39.916	6.30252	0	3.63914	2.96977	9.19695	8.83744	35.1893	26.906	0.385066	0.310639	0.274321	0.167886	68.0092	55.8905	0.0752566	0.0145752	0.0781092	0.0206582	1.81764	1.03167	207.14	195.638	196.727	169.426	45.2796	39.983	218.023	210.702	39.4485	20.1017	0.670058	0.674202	0.829311	0.757393	0.324521
EAE2	22dpi	87	1.5	1.90992	18.2383	12.7136	82.0513	25.1822	26.1164	33.0508	26.1164	57.277	2.34742	37.5587	1.40845	0	6.19377	4.55507	17.8265	18.1328	45.2108	44.7724	0.339424	0.251837	0.198277	0.171698	57.2835	59.2888	0.0280379	0.0353035	0.0300669	0.0387725	1.66033	2.52171	216	220.161	213.113	207.645	43.7943	59.7893	228.87	236.129	39.2458	29.3201	0.728261	0.620968	0.883238	0.884561	0.378897
EAE3	22dpi	22.5
EAE4	22dpi	5	2.5	3.51331	8.8545	7.76051	34.4828	53.9187	34.5031	54.1712	34.5031	3.96476	6.1674	2.20264	43.1718	4.40529	3.00545	4.44344	9.14646	7.82028	33.8213	11.4746	0.315981	0.540025	0.219243	0.100817	66.6597	29.7284	0.0605087	0.00200254	0.0630104	0.0220251	1.40485	2.02589	200.269	140.786	175.707	116.415	60.873	46.7375	204.269	147.429	55.5381	28.4263	0.586538	0.234375	0.738994	0.220126	0.257544
EAE5	22dpi	166.667	2	2.88764	12.3883	9.10199	67.9245	22.2116	14.3773	22.2116	40.4724	56.9892	2.86738	29.3907	5.01792	0	5.47594	3.64917	12.2262	11.5177	31.4542	21.6105	0.457867	0.320653	0.268659	0.17339	59.4841	49.802	0.0506695	0.0224279	0.0461535	0.0214123	1.68571	2.48389	209.571	207.128	197.031	193.282	49.9483	44.2643	215.429	218.641	34.2051	26.5924	0.678793	0.457079	0.864308	0.742706	0.355203
EAE6	22dpi	240	1.5	2.14895	16.8388	12.4336	83.3333	7.74077	17.4479	72.5243	53.6406	61.9266	5.9633	26.1468	0	0	5.5747	4.16514	16.3164	16.1274	37.5211	36.5827	0.348845	0.273025	0.194965	0.171167	54.2842	55.6174	0.0201183	0.02093	0.0130665	0.0355949	1.15369	2.57375	202.321	206.03	182.979	195.504	45.3111	47.6462	210.714	216.606	43.5208	32.4871	0.678793	0.600414	0.745634	0.727653	0.302353
EAE7	22dpi	221	2	2.92096	11.33	9.49059	88	20.8569	10.8724	32.8706	45.615	40.2532	2.02532	50.3797	0	0	5.02073	3.87991	11.4509	11.0198	32.9469	33.8885	0.425252	0.342632	0.266516	0.246877	61.931	63.0876	0.0519516	0.0654623	0.0495764	0.0681631	1.59153	2.57516	215	220.029	212.798	213.489	42.4381	39.1254	222.517	230.057	27.6299	14.6837	0.661812	0.681455	0.875581	0.981639	0.371422
EAE8	22dpi	46.6667
EAE9	22dpi	67.5	3	3.86722	9.55231	5.59806	28.5714	27.1183	15.5172	27.1183	15.5172						5.26033	3.61209	9.38184	8.33931	26.3178	23.4929	0.519709	0.426899	0.320483	0.213859	60.1663	57.6519	0.0599674		0.0626988		1.6816	2.475	213.333	199.2	212	172.657	48.689	47.0499	223.467	204.1	51.6289	22.1593	0.658333	0.5125	0.800839	0.836478	0.351677
EAE10	22dpi	360	1.5	1.21212	25.194	15.5648	93.0233	0.130936	-6.09966	100.077	94.8561	74.6667	1.33333	4	9.33333	0.666667	6.42303	6.67771	25.3152	24.0246	89.3624	51.2025	0.238271	0.265036	0.121338	0.129636	51.484	48.9984	0.00937015	0.00602718	0.00869996	0.0100425	1.16773	2.36084	214	224	198.803	223.614	24.8426	70.9466	218.478	242.043	37.2634	29.2116	0.800332	0.772639	0.795501	0.844877	0.369883
EAE11	22dpi	140	2.5	3.00794	11.228	8.86039	83.0189	14.4053	18.1567	58.4221	41.0008	48.0226	1.12994	37.5706	0	0	5.50064	3.68663	10.8641	10.8464	29.1561	29.1697	0.511657	0.363025	0.310854	0.249282	60.8966	61.8749	0.0618781	0.0625175	0.062682	0.0689097	1.67428	2.64798	217.069	221.462	212.579	216.803	50.4955	55.4131	225.966	240.026	35.1681	25.7802	0.753349	0.604279	0.894159	0.883281	0.421949
EAE12	22dpi	360	0	0.866011	40.568	20.7703	93.3333	0.862069	11.4759	95.8099	71.3615	77.6316	3.94737	18.4211	0	0	7.15311	6.50134	38.6791	36.5075	82.7262	82.5024	0.185555	0.179044	0.0950921	0.0900133	49.1187	50.3177	0.00500977	0.00612752	0.00500977	0.00711661	1.01934	2.59023	212.826	220.87	200.087	209.841	35.0501	64.3402	217.957	232.13	29.0835	32.2024	0.792024	0.661867	0.894253	0.825675	0.394868
EAE-Ex1	22dpi	1.5	3	1.89198	18.0688	9.43597	0										4.21596		17.7812		53.3407		0.226635		0.143467		63.4627		0.0314524		0.0314496		2.18056		201.722		187.104		54.1031		212.944		47.8496		0.680556		0.754717		0.25856
EAE-Ex2	22dpi	18.5	3	3.11424	12.6788	8.62413	0	62.5	15.9091	62.5	115.909						2.92469	5.73017	11.6247	13.3346	48.3274	17.0945	0.273222	0.623154	0.190765	0.0240027	70.4913	18.0303	0.0513525		0.0503617		2.0017	0.625	206.96	124.2	186.971	105.757	45.6453	31.3333	212.16	125.2	55.7897	27.3333	0.6	0.2125	0.724528	0.188679	0.241981
EAE-Ex3	22dpi	80	1	1.96127	17.5127	10.7771	76.1905	13.5606	30.5022	13.5606	30.5022	64.486	8.41121	18.6916	1.86916	0	6.84018	4.20134	17.3007	15.2129	46.5666	30.3388	0.35222	0.258774	0.203237	0.135033	55.8641	51.4241	0.0185312	0.0172463	0.0199502	0.0172434	1.62595	2.57445	210	203.118	199.927	180.898	64.6925	39.6212	218.364	214	31.508	24.5088	0.710227	0.433824	0.84048	0.569737	0.366638
EAE-Ex4	22dpi	5
EAE-Ex5	22dpi	154.667	1.5	2.80332	11.2201	8.64519	76.9231	105.218	24.661	105.269	40.8755	44.1103	0.250627	51.6291	2.50627	0.250627	5.81375	3.87245	11.1226	10.8171	31.1509	31.8128	0.497129	0.338083	0.3091	0.23857	61.8995	62.3059	0.0596597	0.05798	0.0596578	0.0602198	1.39943	2.50606	208.481	213.297	197.425	202.894	55.8258	38.8085	211.333	220.514	41.2714	21.1057	0.752243	0.678194	0.910252	0.955689	0.403694
EAE-Ex6	22dpi	20.6667
EAE-Ex7	22dpi	161	2	3.26713	10.9807	9.45341	69.5652	31.1414	34.1395	40.1421	34.1395	43.3333	8.97436	37.9487	4.35897	0.512821	3.36733	3.10528	9.72379	9.23536	44.9699	17.5171	0.328368	0.349655	0.242005	0.1718	74.1277	49.0322	0.0691075	0.0185509	0.0743799	0.0225478	1.7523	1.56507	213.511	198.978	203.215	177.686	41.475	43.2784	225.556	212.696	35.0818	20.6417	0.657005	0.482042	0.837339	0.617419	0.30686
EAE-Ex8	22dpi	94.6667
EAE-Ex9	22dpi	60.6667	3	3.17878	10.8637	7.01975	0										3.21495		11.1627		44.1887		0.28301		0.192999		67.6012		0.0405567		0.0422222		1.79044		193.707		166.757		30.6589		202.805		39.0815		0.568096		0.616255		0.189009
EAE-Ex10	22 dpi	21	2	3.25847	9.25546	6.75026	0		12.3813		24.987						3.88209	2.80604	9.02711	8.2428	34.6303	21.9842	0.45215	0.300935	0.297946	0.202616	74.0577	51.2016	0.0784723		0.0871915		1.80892		198.6	192.167	175.363	168.315	71.5107	29.0094	208.1	194.333	46.4353	30.1144	0.675159	0.679406	0.763407	0.914826	0.295766
EAE-Ex11	22 dpi	360	0.5	1.38695	25.3475	13.8393	97.9592	-0.104802	-3.03041	98.1169	96.4188	66.1224	0.816327	22.449	1.63265	2.04082	5.65241	5.47069	22.9059	23.6267	44.4849	45.401	0.304348	0.276505	0.1535	0.13863	54.1162	53.1931	0.0190116	0.0281553	0.0151013	0.0221165	1.14201	2.38368	203.538	207.643	188.751	197.301	41.3259	72.8381	212.769	229.571	39.0373	34.2425	0.725135	0.639217	0.822616	0.727805	0.341887
EAE-Ex12	22 dpi	29
EAE1	25dpi	25.5	3	3.99868	8.0941	5.9264	0	47.5018		47.5018							3.37278	3.65442	8.63135	8.58298	56.9751	11.7609	0.377729	0.412864	0.295306	0.0968349	81.1634	25.3004	0.115469		0.10859		2.41944		206.286	178.5	191.21	140.663	52.2813	41.0835	220.333	181.9	51.6284	35.1794	0.645833	0.5125	0.793651	0.786164	0.291816
EAE2	25dpi	116	2	1.45026	23.6721	14.5034	91.4286	19.8932	17.1576	19.8932	17.1576	61.9718	2.8169	18.3099	6.33803	0	6.26273	5.39888	23.1137	22.3167	60.691	43.8402	0.260554	0.236016	0.157531	0.117938	59.0436	51.1539	0.0259206	0.00890409	0.024161	0.00946098	1.8675	2.83494	215.48	207	204.203	179.951	40.2368	32.9213	222.28	212	43.7241	24.0285	0.71	0.5	0.860377	0.745041	0.352358
EAE3	25dpi	26
EAE4	25dpi	9
EAE5	25dpi	244	2	2.28365	15.042	9.96773	83.7209	23.0226	12.6684	30.0205	12.6684	49.2366	3.81679	39.6947	0.763359	0	5.99252	4.56435	14.6058	14.9011	36.3164	38.4141	0.41279	0.305951	0.23967	0.200921	57.3508	63.2915	0.0406064	0.0466204	0.0316439	0.0454705	1.48275	2.46051	212.111	221.706	204.139	207.933	40.3586	51.4481	220	234.118	29.7816	23.6843	0.696759	0.630515	0.833916	0.802812	0.335575
EAE6	25dpi	240	2	2.0357	16.0522	11.7984	66.6667	27.1429	32.5833	27.1429	44.2596	36.0169	12.7119	33.4746	6.35593	0	5.01865	3.44426	15.8618	14.2789	49.9977	36.0867	0.297643	0.235858	0.200863	0.100266	62.9807	50.3161	0.04814	0.00664769	0.0459727	0.0107098	1.9459	1.27114	210.71	185.39	201.054	157.819	49.0795	28.2041	217.516	189.049	47.2796	20.1337	0.691532	0.559451	0.768919	0.662678	0.320932
EAE7	25dpi	14.3333
EAE8	25dpi	24.3333
EAE9	25dpi	262	2	2.88073	11.6783	9.99824	8.16327	69.4444	45.2607	69.4444	48.0009						3.16445	3.76618	11.5539	11.9633	52.3719	19.2298	0.261649	0.320676	0.19639	0.115245	75.2861	38.7605	0.0666068	0	0.0661546	0.0299655	1.92725	1.15	215.269	200.524	201.867	172.885	38.4713	43.1198	226.058	210.571	49.2036	25.9072	0.663462	0.553571	0.833333	0.709793	0.318321
EAE10	25dpi	360	1.5	1.30157	27.7269	15.3375	94.7368	-0.671282	7.28682	86.9244	68.4209	69.9531	1.87793	11.2676	1.87793	3.75587	6.15242	5.15459	25.3698	24.35	44.2064	48.0098	0.279489	0.229255	0.119877	0.110883	42.2548	45.595	0.00234468	0.0119578	0.00234468	0.0134526	1.18724	2.32977	162.56	186.1	119.516	141.181	56.0073	42.3607	173.12	191.2	35.8101	38.4974	0.439506	0.384774	0.5175	0.533333	0.0615741
EAE11	25dpi	125.5	3	1.59926	17.8018	11.5957	82.0513	14.3248	14.1944	110.308	60.4895	65.2361	8.58369	15.0215	0	0	5.54678	5.10622	16.3813	16.3657	42.2398	37.3113	0.335105	0.302923	0.177219	0.156289	54.1904	53.12	0.0163227	0.0140988	0.0147441	0.0177506	1.20649	2.0222	163.519	176.839	133.536	143.12	55.1713	41.2229	179.074	185.871	26.2575	24.2674	0.550983	0.454002	0.664352	0.612903	0.112454
EAE12	25dpi	360	0	1.0117	32.4159	17.4435	94.1176	-1.97405	2.27273	96.9353	101.515	64.2857	2.38095	0	0	11.9048	7.62214	6.17022	31.4612	32.014	60.8613	58.025	0.238136	0.202477	0.10793	0.0947183	45.3424	54.6399	0.00333018	0.0049971	0.00249806	0.00357172	1.03909	2.40539	171.75	188.739	131.038	157.873	63.2224	46.3511	184.05	191.522	30.3841	31.6509	0.552469	0.456253	0.625	0.619565	0.103395
EAE-Ex1	25dpi	1
EAE-Ex2	25dpi	9
EAE-Ex3	25dpi	127.5	1	2.33062	14.2316	9.63489	90.9091	15.9446	22.6241	15.9446	22.6241	58.804	4.31894	33.2226	0.996678	0.664452	6.33168	5.4158	14.5645	14.5296	39.2122	33.049	0.417943	0.359217	0.244216	0.215185	58.4123	53.4082	0.0376311	0.0377186	0.0323363	0.0381649	1.63771	2.46594	211.92	219.833	205.349	210.312	47.8239	45.7691	222.32	231.367	35.7357	16.8067	0.7	0.664583	0.850314	0.802935	0.349686
EAE-Ex4	25dpi	24.5
EAE-Ex5	25dpi	7.66667	2.5	4.73158	6.36351	8.2165	0		41.6675		52.7786						2.26765	1.72741	5.73977	5.40212	64.3186	11.8477	0.358029	0.268411	0.320018	0.0658827	89.0804	38.42	0.141748		0.139751		2.03993		211.176	154.2	204.627	121.948	59.2049	30.6754	224.706	159.6	49.4613	10.4123	0.632353	0.23125	0.832408	0.289308	0.317471
EAE-Ex6	25dpi	8.66667
EAE-Ex7	25dpi	221.667	2	2.15083	19.9587	11.8509	92.8571	26.6847	23.8452	40.3133	31.9447	54.4379	5.91716	30.4734	2.66272	0.295858	5.10918	4.33511	19.1989	17.3129	54.655	31.649	0.310054	0.283257	0.206951	0.140417	62.672	47.2202	0.0453313	0.012208	0.0515838	0.0147984	1.59668	1.75208	208.531	207.5	198.11	191.292	31.4022	47.7964	220.062	221.75	31.9898	16.4814	0.681641	0.604167	0.870676	0.856045	0.347877
EAE-Ex8	25dpi	17
EAE-Ex9	25dpi	102	2.5	3.90752	8.42343	6.95334	0	60.1804	26.4706	58.8402	26.4706						2.7769	5.7223	8.6196	9.28856	51.7482	51.1886	0.325069	0.57568	0.257984	0.122238	76.7374	34.2147	0.0765804		0.0926786		1.76829	0.708333	203.356	176.375	182.394	143.286	29.1685	37.7292	213.305	180	37.3623	22.8646	0.602754	0.546875	0.736595	0.644654	0.261433
EAE-Ex10	25dpi	265
EAE-Ex11	25dpi	360	0	0.737973	44.4291	23.9861	94.7368	-2.36199	4.85348	98.1131	73.2083	81.7073	0	0	2.43902	4.87805	7.25902	6.42738	42.3771	40.6607	75.0678	66.3323	0.169261	0.149437	0.0702837	0.0606459	41.258	39.7061	0.000717601	0.0018837	0.000717601	0.0018837	0.960531	2.65284	163.773	190.72	120.028	147.365	48.7452	42.4683	169.591	197.8	31.8333	36.3667	0.460157	0.4	0.553977	0.57	0.0701459
EAE-Ex12	25dpi	123
EAE1	28dpi	116	2.5	3.72061	8.80801	10.4603	72.7273	36.7433	30.9842	42.2988	30.9842	24.5714	8.19048	51.0476	8.38095	0	3.25836	3.13663	8.74725	8.89263	42.3367	21.3416	0.349805	0.337388	0.271367	0.171632	73.189	48.9489	0.0808347	0.0164137	0.101921	0.0161602	2.01943	1.95338	211.326	202.96	195.339	180.587	51.0255	41.0811	222.739	212.46	34.5387	18.7336	0.558424	0.5275	0.823079	0.859119	0.277892
EAE2	28dpi	147.5	2	1.71861	19.4357	13.077	84.2105	28.2512	27.3163	28.2512	27.3163	51.4286	6.19048	37.1429	0.952381	0	6.19356	4.45662	19.5211	19.3922	50.9808	43.4383	0.310214	0.224102	0.191388	0.139136	60.2038	56.3749	0.0289661	0.0306265	0.0491602	0.0258405	1.65917	2.62031	213.56	216.906	207.557	195.88	56.4741	47.2121	222.48	227.656	40.5562	22.8716	0.6875	0.486328	0.928302	0.815645	0.359434
EAE3	28dpi	15.5	3	2.6778	11.2712	9.15577	68.0851	30.0815	13.9331	30.0815	13.9331	58.3333	3.84615	7.69231	12.1795	0	4.54551	4.09787	10.1615	9.64897	28.4516	19.4479	0.408043	0.373969	0.242143	0.114222	58.5658	38.1876	0.0395966	0.00217525	0.0399972	0.00565485	0.894255	0.853024	202.758	149.419	174.24	127.354	42.2802	50.5801	207.515	166.742	32.0718	19.0702	0.537879	0.387097	0.747094	0.628931	0.235015
EAE4	28dpi	48
EAE5	28dpi	347.333	2	2.3149	17.735	9.58258	65.1163	30.6184	100.094	50.2177	99.3613	60.1246	2.18069	19.6262	3.73832	0	5.88339	4.23645	13.9167	14.8996	38.3535	27.3199	0.440011	0.315757	0.255278	0.152488	61.7388	53.5443	0.0510956	0.015201	0.0522666	0.0156433	1.06417	2.5598	206.2	204.118	188.08	180.699	40.9198	34.2383	210.76	208.618	37.0157	27.1012	0.7175	0.511029	0.81761	0.710322	0.358648
EAE6	28dpi	360	2	3.14068	11.6088	9.11917	68.75	12.5223	12.469	42.5163	53.0928	50.5952	0.793651	31.5476	3.37302	0	5.15721	3.43235	11.3347	10.7638	31.8608	26.457	0.462247	0.34603	0.282961	0.221687	61.9729	54.6213	0.0620402	0.0405246	0.0591221	0.0488046	1.09163	2.82478	204.875	212.93	181.973	197.539	47.0068	40.9888	212.594	219.651	47.9612	32.4957	0.677734	0.593023	0.774371	0.715226	0.308815
EAE7	28dpi	64	2	3.84411	9.20998	8.38412	93.75	22.6618	18.9174	22.6618	116.852	54.1367	5.93525	33.0935	1.79856	0	4.01014	3.80192	9.07265	9.05501	28.5531	21.3761	0.449072	0.404911	0.294031	0.219133	66.3609	51.97	0.0746133	0.0187336	0.073926	0.0199423	1.70583	2.38144	199.784	204.61	195.086	190.493	71.5214	67.0716	219.297	218.756	35.4784	33.3328	0.518581	0.550305	0.800612	0.85596	0.293855
EAE8	28dpi	46
EAE9	28dpi	285	2	2.33349	14.1446	13.2959	66.6667	39.9675	33.0548	39.9675	33.0548	25.5663	18.123	41.4239	5.50162	0.323625	3.57922	3.54394	14.0104	13.2374	58.7925	30.9424	0.246771	0.272752	0.176655	0.135875	71.1419	54.4442	0.0554726	0.0132431	0.0542587	0.0132427	1.77861	1.6733	203.878	202.884	184.841	180.148	41.4994	23.8859	211.683	205.349	44.8627	14.7697	0.483232	0.659884	0.711766	0.982887	0.217537
EAE10	28dpi	360	1.5	1.01163	39.1801	15.5656	96	14.0654	-3.44828	110.549	93.4848	66.6667	0	33.3333	0	0	7.33978	7.32896	34.3441	32.7206	57.5821	65.3534	0.255882	0.254144	0.113786	0.123203	45.887	51.5305	0.012457	0.0199312	0.0099656	0.0166093	1.41026	2.23039	162.062	183.941	134.859	151.11	48.4892	38.0396	171.75	192.235	25.669	25.2011	0.669071	0.576923	0.700935	0.634048	0.145778
EAE11	28dpi	64.5	2	2.74763	13.2515	10.1253	66.6667	23.1229	24.5942	49.3358	39.3041	56.0261	6.18893	26.0586	0.325733	0	4.72059	3.17287	12.4657	13.8327	29.1103	30.6235	0.362799	0.270554	0.217682	0.159668	55.7284	57.8077	0.0280255	0.0318243	0.0300279	0.0418355	1.38813	2.64462	158.321	180.585	136.227	153.891	49.5535	23.6619	172.179	185.537	28.6979	14.553	0.636447	0.47217	0.687583	0.656485	0.151199
EAE12	28dpi	360	0	1.01065	29.3205	16.7666	91.4286	95.2884	10.6103	95.5655	68.5064	71.9512	0	18.2927	1.21951	0	6.88461	6.37643	28.6474	27.6123	57.0532	60.9795	0.238772	0.221075	0.11702	0.11599	47.4291	49.0617	0.00289695	0.00954214	0.00508599	0.0146404	1.29516	2.79822	169.136	200.478	137.43	173.762	50.7215	33.2373	179.5	203.522	26.473	24.7227	0.649767	0.649387	0.693854	0.750372	0.137609
EAE-Ex1	28dpi	2
EAE-Ex2	28dpi	12.5	3	3.81148	8.17605	10.3734	51.1628	17.8817	13.8253	79.642	58.5358	14.2012	11.2426	21.8935	18.6391	0	2.51457	2.70385	8.06385	7.61752	44.6331	13.6447	0.309767	0.329649	0.233143	0.0693994	73.2853	28.173	0.0773768	0.00174657	0.0759129	0.00174657	2.07359	0.364719	208.158	134.627	179.124	114.804	46.0796	35.6864	214.596	141.882	51.0855	26.5211	0.503289	0.328431	0.691824	0.402022	0.207851
EAE-Ex3	28dpi	211	0.5	2.9283	12.88	7.86106	92.3077	103.887	6.00752	103.332	105.923	63.253	3.91566	29.5181	0	0	6.33057	5.74522	12.6427	12.5936	32.8705	35.5013	0.499946	0.437738	0.280033	0.263684	57.6524	57.5666	0.0337126	0.0404715	0.0343418	0.039936	1.44444	2.7311	214.542	217.63	205.453	209.025	38.1209	56.596	226.792	234.519	35.4937	18.2558	0.684896	0.680556	0.794025	0.922432	0.331335
EAE-Ex4	28dpi	15
EAE-Ex5	28dpi	144	2	3.56808	9.72417	7.51505	78.6885	18.8347	10.141	27.4486	110.067	25.6098	1.56794	56.0976	1.0453	0	4.26951	3.89341	9.22573	8.71868	33.2935	33.4941	0.450833	0.425604	0.314757	0.300774	70.561	65.4324	0.0882692	0.0982022	0.0872213	0.109217	1.50529	2.1363	204.027	205.775	194.142	194.167	62.5367	39.6651	212.703	212.4	41.0938	23.585	0.70777	0.69375	0.855006	1.11006	0.376827
EAE-Ex6	28dpi	40.6667	2.5	2.39274	13.8759	10.5436	85.1064	26.3487	30.5936	26.3487	30.5936	41.3793	8.04598	37.069	2.87356	0.287356	4.37604	4.75644	14.1833	13.1495	53.9605	31.3118	0.298532	0.34086	0.220645	0.19782	68.1856	51.6264	0.0515722	0.0239428	0.0581203	0.0313497	1.83746	1.52823	209.941	201.935	197.063	183.903	27.3106	37.1166	223.735	210.097	35.6133	23.4106	0.65625	0.685484	0.852756	0.839927	0.298395
EAE-Ex7	28dpi	270
EAE-Ex8	28dpi	36.5
EAE-Ex9	28dpi	116.5	3	3.75206	8.65996	9.70738	50	25.72	15.5296	55.1499	63.579	5.74413	4.43864	33.9426	21.4099	4.96084	2.65163	2.41083	8.18126	7.25968	49.5141	17.4176	0.320727	0.327076	0.253791	0.158169	76.0468	46.4208	0.0924738	0.047653	0.0970587	0.040751	1.72425	1.52117	202.482	168.051	188.023	144.936	37.8494	42.5649	215.214	180.718	45.3112	25.4581	0.640625	0.395833	0.792902	0.433801	0.281966
EAE-Ex10	28dpi	323	2	2.81546	10.7449	12.0883	40	23.2109	21.8474	52.0337	48.0347	27.7778	8.44444	34.6667	3.33333	0	3.64168	2.12483	9.71063	11.7235	33.0574	28.3931	0.394213	0.229479	0.278721	0.139668	68.8094	51.7765	0.0729538	0.0377303	0.0871954	0.0364353	1.82025	2.42196	172.743	151.719	146.193	132.422	44.5398	24.3049	181.514	160.422	33.2367	16.8695	0.580586	0.447716	0.642635	0.568536	0.153937
EAE-Ex11	28dpi	295.5	0	0.944738	35.6367	19.652	94.1176	-0.197368	11.3784	98.7939	108.605	78.8462	0.961538	5.76923	0.961538	6.73077	6.38979	6.11818	32.1352	32.496	62.2617	58.0894	0.195733	0.181243	0.0954405	0.0808202	46.2853	40.5033	0.000713849	0.00187404	0.00356925	0.00312327	1.03268	2.2427	168.545	185.958	127.082	146.85	44.9975	27.6131	176.636	188.458	35.5982	29.1471	0.635198	0.528846	0.56358	0.617861	0.102208
EAE-Ex12	28dpi	185
EAE5	31dpi	285	2	2.33797	14.3449	9.41048	73.6842	16.4723	4.70717	16.4723	105.135	63.8298	2.97872	20.8511	3.82979	0	5.61075	5.00554	13.4514	14.7268	35.9712	30.3872	0.381826	0.33469	0.237946	0.195159	58.8743	52.6239	0.0283927	0.0199734	0.0352291	0.0305391	1.44259	2.29916	209.741	210.654	192.538	197.313	37.6077	36.8573	216.63	219.538	33.4665	27.7267	0.655093	0.649038	0.794316	0.849057	0.312864
EAE6	31dpi	360	1.5	2.13789	16.3531	11.7694	85.1064	11.5793	9.59252	42.1999	51.5752	63.7363	0.732601	23.0769	2.1978	0	5.25965	4.8675	15.8158	15.8579	42.2989	36.6787	0.314445	0.305261	0.184103	0.176587	58.5624	52.4627	0.0248476	0.032221	0.027721	0.0368069	1.27658	2.87236	206.207	215.969	183.057	208.834	47.5968	60.6331	212.621	228.781	48.1066	25.5317	0.674569	0.617188	0.707005	0.805818	0.278275
EAE7	31dpi	149	2	2.72375	12.4077	9.40288	88.8889	19.7502	17.9094	19.7502	17.9094	48.19	5.88235	30.9955	3.16742	0	4.75427	4.34919	11.1587	10.8472	34.2911	26.4745	0.417113	0.377211	0.262685	0.209243	62.5974	51.8346	0.0587217	0.036181	0.0595946	0.0415656	1.76512	2.30723	208.935	209.514	202.933	192.18	46.0035	50.5845	223.355	221.886	31.1879	19.9819	0.606855	0.628571	0.841956	0.876909	0.336656
EAE8	31dpi	6.5
EAE9	31dpi	220.5
EAE10	31dpi	360	2	0.593302	55.5513	27.5726	100	7.53968	-7.02381	105.655	91.9623	70.4545	0	0	2.27273	9.09091	8.18671	8.09265	48.5747	44.056	99.5367	95.7286	0.136564	0.140203	0.055867	0.0600837	38.7562	38.8853	0	0.000912342	0	0.000912342	1.21499	2.33519	176.895	196.632	143.081	158.695	39.7055	44.4403	184.263	202.316	25.9774	27.9532	0.663616	0.526316	0.750457	0.601029	0.147674
EAE11	31dpi	48	2	2.38805	14.247	10.5766	64	11.8863	14.9621	47.3784	49.517	63.2836	1.49254	18.806	6.26866	0	6.00097	3.73123	13.6972	13.9966	37.4852	22.4617	0.413639	0.283289	0.243403	0.161352	58.5432	45.5864	0.0356795	0.0139968	0.0377137	0.0239995	1.41286	2.72611	178.821	180.846	146.693	142.338	57.6923	35.2351	191.107	185.282	30.01	25.653	0.649956	0.414079	0.723299	0.519291	0.15381
EAE12	31dpi	360	0	0.735103	45.9933	21.8873	92.3077	3.03309	-3.33333	100.053	98.3333						8.03992	7.99682	45.7909	44.6155	84.8395	89.2736	0.168213	0.169207	0.0747533	0.0816224	42.7914	46.0472	0	0.000908669	0	0.00272795	1.21772	2.80211	179.579	199.579	142.614	167.025	52.9637	53.734	186.737	205.632	32.3183	35.5083	0.611311	0.500163	0.757098	0.71393	0.140043
EAE-Ex5	31dpi	170.5	2	2.77101	11.0085	7.87761	89.7959	17.8248	18.3987	17.8248	26.5588	50.5976	2.78884	43.0279	0.796813	0	5.40458	5.15407	10.4671	10.904	29.8764	29.4471	0.488914	0.448791	0.315098	0.284929	62.2823	62.3644	0.0594267	0.0598926	0.0704092	0.0704045	1.5931	2.3023	208.034	223.571	200	215.531	60.6659	37.1857	217.345	231.286	37.4631	25.5453	0.69181	0.745536	0.854478	1.10512	0.359873
EAE-Ex6	31dpi	102
EAE-Ex7	31dpi	360	2	2.17052	16.3769	12.0204	93.617	26.8438	31.2881	26.8438	31.2881	45.6204	17.8832	33.9416	0	0	5.39983	4.7164	14.3205	14.536	44.1314	36.992	0.329343	0.278323	0.200538	0.163833	61.4635	55.4976	0.0362381	0.0183562	0.0338576	0.0208551	1.60075	1.57279	208.793	205.758	187.908	188.807	34.5409	45.4344	219.379	220.03	32.3805	20.1666	0.663793	0.651515	0.806766	0.768058	0.292372
EAE-Ex8	31dpi	103.5
EAE-Ex9	31dpi	159	2	4.16548	8.28982	8.45731	50	24.6953	19.4898	42.3493	44.0211	22.9592	3.57143	29.5918	16.8367	2.55102	3.00655	2.58639	7.12642	7.87519	52.707	21.3968	0.397253	0.332832	0.321106	0.143633	82.093	43.1352	0.112214	0.0208095	0.132967	0.0208095	1.71726	1.46175	206.381	184.931	189.717	157.893	31.8884	33.0284	214.19	194.31	38.695	17.5112	0.666667	0.510776	0.772686	0.667968	0.283768
EAE-Ex10	31dpi	360	2	1.5733	20.2394	13.9649	86.4865	33.019	39.9477	33.019	39.9477	40.9091	23.3766	18.8312	0	0.649351	6.28834	3.84786	19.2152	18.9008	48.3901	32.5368	0.299902	0.197378	0.168348	0.0853509	55.857	47.9611	0.016461	0.00791284	0.0164615	0.00738427	1.30616	2.0015	176.05	175.345	139.454	141.647	53.4552	23.1457	186.45	180.069	30.7954	14.2686	0.602484	0.50332	0.589905	0.628739	0.117562
EAE-Ex11	31dpi	360	0	0.841431	44.2504	24.5314	94.1176	1.02416	11.9259	99.3885	46.2582	71.7391	2.17391	17.3913	2.17391	0	6.88543	5.92126	41.4264	39.5729	76.5041	68.9594	0.16564	0.150904	0.0748862	0.0705523	42.4815	45.1191	0.00154115	0.00501064	0.0030823	0.00500873	0.965198	2.30894	168.762	197.435	132.18	156.286	49.7968	50.054	183.381	204.522	27.0545	34.3144	0.570837	0.450986	0.648941	0.603484	0.106179
EAE-Ex12	31dpi	109
EAE5	36dpi	334	2	1.64691	19.7496	12.136	75.6757	5.17501	30.1234	101.72	44.4092	66.6667	6.06061	27.2727	0	0	6.99161	4.66102	20.1126	21.8372	50.4687	38.7265	0.339429	0.221914	0.189667	0.136268	57.1832	53.235	0.017304	0.01746	0.0272789	0.0234425	1.57178	2.22629	214.087	215.207	208.243	195.945	48.1198	50.5385	223.13	224.379	27.94	21.7317	0.73913	0.607759	0.891441	0.657124	0.362661
EAE6	36dpi	226	2	1.95553	16.5466	12.3832	76.5957	0.0381339	83.3175	98.4984	83.5923	60.5882	3.52941	30.5882	0	0	5.43874	3.91842	15.6767	16.171	36.6666	39.5184	0.345414	0.252537	0.188682	0.165899	56.05	58.4438	0.0215511	0.0278164	0.0215494	0.0412562	1.3289	2.78558	213.556	221.182	198.746	209.438	34.4224	46.85	220.704	231.515	26.4896	21.9436	0.673611	0.594697	0.831586	0.834763	0.31199
EAE7	36dpi	248.5	2	3.61725	8.73886	8.02825	92.3077	13.1389	18.8558	113.139	30.0116	50.5119	2.38908	44.198	0.511945	0	4.38399	3.78352	8.43047	8.45997	25.8136	23.2306	0.498183	0.453754	0.322407	0.262889	64.2389	57.5362	0.0743306	0.0405897	0.080629	0.0521945	1.70241	2.5663	204	213.975	202.878	214.236	45.8367	38.0751	214.629	226.875	21.2714	16.6377	0.605357	0.778125	0.894879	1.12107	0.368823
EAE8	36dpi	28	3	2.7628	11.8768	9.28478	86.2745	13.3859	31.3488	43.4309	41.4173	30.6494	8.31169	51.6883	0.25974	0	4.87039	3.94747	11.7703	11.8593	39.5045	34.0505	0.440674	0.337406	0.301188	0.216676	69.2396	57.6982	0.0832213	0.0477029	0.0860686	0.0499216	1.68424	2.03834	213.933	208.595	212.313	204.515	45.2012	51.0096	227.267	220.919	39.9378	18.2619	0.664583	0.814189	0.834382	1.30716	0.346174
EAE9	36dpi	310.5
EAE10	36dpi	294	1	1.42717	23.6686	14.6189	88.8889	-0.0639792	2.21393	100.574	80.6349	65.6863	2.45098	25.9804	1.47059	1.47059	5.80163	5.30122	22.2455	21.3268	40.1893	46.5963	0.298665	0.2769	0.130964	0.155222	43.9376	54.3754	0.00166844	0.0330323	0.00166946	0.0310317	1.1106	2.37449	153.538	186.429	118.684	150.271	49.0622	32.4141	158.423	189.321	30.436	28.1976	0.572175	0.573192	0.557692	0.662946	0.0933345
EAE11	36dpi	120	2	1.83237	29.4758	12.673	84.2105	26.3748	2.97236	42.1589	104.096	61.0526	4.21053	22.1053	3.15789	1.05263	6.30125	5.10111	31.0496	32.2301	81.1199	76.6898	0.321415	0.27116	0.18864	0.153777	55.7472	53.2657	0.0231579	0.0206853	0.0290747	0.0206853	1.82099	2.79707	150.708	174.714	123.089	138.384	53.4419	28.8552	160.542	181.357	28.7998	23.9715	0.588992	0.473986	0.713542	0.674107	0.111883
EAE12	36dpi	360	0	0.860687	38.6562	18.0008	100	-12.3333	-3.21085	96.262	99.3895	84	6	2	0	2	7.62305	7.56076	37.1797	36.5335	66.4672	64.8917	0.213571	0.224477	0.0959069	0.0987862	44.5166	44.8445	0.00199293	0.00166077	0.000996464	0.00249454	1.12826	2.41821	144.778	191.95	125.163	158.39	56.6097	40.8931	160.389	197.7	27.5603	27.714	0.593278	0.589506	0.767361	0.753125	0.131387
EAE-Ex5	36dpi	205.5	2	2.77101	11.0085	7.87761	89.7959	17.8248	18.3987	17.8248	26.5588	50.5976	2.78884	43.0279	0.796813	0	5.40458	5.15407	10.4671	10.904	29.8764	29.4471	0.488914	0.448791	0.315098	0.284929	62.2823	62.3644	0.0594267	0.0598926	0.0704092	0.0704045	1.5931	2.3023	208.034	223.571	200	215.531	60.6659	37.1857	217.345	231.286	37.4631	25.5453	0.69181	0.745536	0.854478	1.10512	0.359873
EAE-Ex6	36dpi	109.5
EAE-Ex7	36dpi	277.5	2	2.17052	16.3769	12.0204	93.617	26.8438	31.2881	26.8438	31.2881	45.6204	17.8832	33.9416	0	0	5.39983	4.7164	14.3205	14.536	44.1314	36.992	0.329343	0.278323	0.200538	0.163833	61.4635	55.4976	0.0362381	0.0183562	0.0338576	0.0208551	1.60075	1.57279	208.793	205.758	187.908	188.807	34.5409	45.4344	219.379	220.03	32.3805	20.1666	0.663793	0.651515	0.806766	0.768058	0.292372
EAE-Ex8	36dpi	106.5
EAE-Ex9	36dpi	190	2	4.16548	8.28982	8.45731	50	24.6953	19.4898	42.3493	44.0211	22.9592	3.57143	29.5918	16.8367	2.55102	3.00655	2.58639	7.12642	7.87519	52.707	21.3968	0.397253	0.332832	0.321106	0.143633	82.093	43.1352	0.112214	0.0208095	0.132967	0.0208095	1.71726	1.46175	206.381	184.931	189.717	157.893	31.8884	33.0284	214.19	194.31	38.695	17.5112	0.666667	0.510776	0.772686	0.667968	0.283768
EAE-Ex10	36dpi	360	2	1.5733	20.2394	13.9649	86.4865	33.019	39.9477	33.019	39.9477	40.9091	23.3766	18.8312	0	0.649351	6.28834	3.84786	19.2152	18.9008	48.3901	32.5368	0.299902	0.197378	0.168348	0.0853509	55.857	47.9611	0.016461	0.00791284	0.0164615	0.00738427	1.30616	2.0015	176.05	175.345	139.454	141.647	53.4552	23.1457	186.45	180.069	30.7954	14.2686	0.602484	0.50332	0.589905	0.628739	0.117562
EAE-Ex11	36dpi	130	0	0.841431	44.2504	24.5314	94.1176	1.02416	11.9259	99.3885	46.2582	71.7391	2.17391	17.3913	2.17391	0	6.88543	5.92126	41.4264	39.5729	76.5041	68.9594	0.16564	0.150904	0.0748862	0.0705523	42.4815	45.1191	0.00154115	0.00501064	0.0030823	0.00500873	0.965198	2.30894	168.762	197.435	132.18	156.286	49.7968	50.054	183.381	204.522	27.0545	34.3144	0.570837	0.450986	0.648941	0.603484	0.106179
EAE-Ex12	36dpi	242
EAE5	42dpi	143	3	2.38993	13.2009	11.2034	48.2759	32.1712	42.9892	32.1712	46.6273	0	0	14.2857	0	71.4286	3.27847	3.72289	12.8589	11.7421	60.1177	18.996	0.242548	0.302201	0.185114	0.0849276	75.2034	39.15	0.063164	0.00411954	0.0674722	0.00235443	1.92459	0.904948	212.574	166.875	196.647	138.485	36.91	33.7536	221.787	170.281	41.7128	31.0859	0.647606	0.416016	0.81761	0.503145	0.302338
EAE6	42dpi	359	2	2.35771	17.5131	11.3789	83.0189	-0.470039	16.4655	99.5901	35.3496	57.8635	1.18694	31.1573	0.593472	0	5.42437	3.83946	15.6153	13.9654	41.9171	41.6291	0.357838	0.287171	0.205092	0.193721	58.1754	62.0315	0.0337436	0.0413007	0.0346926	0.057489	1.11782	2.66422	208.345	213.846	194.74	207.487	31.7561	60.3777	216.103	227.692	33.1588	29.4116	0.698276	0.677885	0.804598	0.865989	0.314194
EAE7	42dpi	238	2	3.50897	9.38204	8.02512	88.8889	20.5558	7.45452	42.0695	107.654	29.0792	1.29241	59.2892	0	0	4.39669	3.60461	8.94963	8.79406	31.1723	30.4674	0.497599	0.420057	0.332062	0.292493	68.2356	67.4258	0.0881571	0.0908427	0.0924384	0.0890171	1.98996	2.83919	212.056	224.452	208.807	216.262	47.57	40.1984	223.444	236.262	27.0271	20.2708	0.637153	0.772321	0.821104	1.07966	0.331171
EAE8	42dpi	68	3	2.65382	12.4932	12.2501	76.1905	30.733	23.6201	30.733	43.9146	22.7749	18.5864	56.2827	0.52356	0	3.87767	3.83123	12.818	12.3134	52.217	34.239	0.285434	0.285517	0.217338	0.169956	73.934	53.1637	0.0649391	0.0202559	0.0691684	0.0202557	1.90907	1.71135	213.561	210	203.197	206.054	53.8549	25.3817	223.024	217.615	45.1489	15.7637	0.632622	0.778846	0.766989	1.28689	0.311685
EAE9	42dpi	275
EAE10	42dpi	333	1.5	1.31037	26.858	16.8669	95.2381	1.27659	7.21937	102.034	74.4058	79.3388	2.47934	0.826446	0	5.78512	6.41349	5.43818	22.9	22.2759	47.456	50.4948	0.247578	0.20531	0.106466	0.100129	43.5925	52.0977	0.000586245	0.00177936	0.000586245	0.00236036	1.34843	2.58968	130.88	169.481	111.756	140.426	47.0341	30.12	136.64	173.556	33.2465	39.2096	0.525786	0.442581	0.548428	0.535756	0.10854
EAE11	42dpi	101	2	1.79399	17.7798	13.661	76.9231	16.2152	11.3422	55.483	58.6598	57.5342	7.30594	20.0913	1.36986	2.73973	4.9005	3.55912	17.5635	17.6491	31.4084	30.2985	0.296903	0.232808	0.152397	0.12033	52.1567	52.2205	0.0115382	0.0179343	0.0115382	0.0193701	1.72453	2.81927	127.167	153.211	108.98	127.874	50.5402	32.5763	134.6	156.947	30.2274	26.3503	0.400419	0.377358	0.509434	0.460113	0.0830663
EAE12	42dpi	193	0	1.07194	32.3679	16.1264	91.4286	9.65909	13.8083	109.659	86.021	83.6735	0	0	0	6.12245	6.99384	6.33311	29.252	27.6058	58.0025	57.7755	0.252168	0.221143	0.12138	0.111217	49.1914	48.8711	0.0153898	0.018131	0.0123109	0.00125095	1.38515	2.98895	124.429	162.083	110.673	139.011	55.3653	44.7768	134.476	169.75	32.4291	33.2469	0.434262	0.466457	0.569033	0.539832	0.106423
EAE-Ex5	42dpi	262.5	2	2.62567	12.4703	10.1165	62.7451	22.9682	31.794	22.9682	38.0751	53.0387	0.552486	41.7127	1.9337	0	5.30191	3.43004	11.6859	12.8301	34.855	26.7211	0.420251	0.308207	0.291262	0.188962	62.2333	54.0796	0.0607568	0.031826	0.0721688	0.0418094	1.50406	2.15152	209.517	207.65	201.214	194.447	51.5834	33.9576	219.552	213.55	36.825	23.4936	0.696121	0.626563	0.873997	0.960692	0.35662
EAE-Ex6	42dpi	113.5	2	2.16307	14.9208	10.3601	86.9565	12.137	28.2988	112.068	28.2988	55.6667	12	23	1.33333	0.666667	4.91802	4.54956	12.1492	13.3803	37.1035	28.1309	0.395164	0.316786	0.23879	0.163234	62.7778	49.8223	0.0533856	0.0117163	0.0424156	0.0117169	1.34003	1.38394	197.893	205	183.1	195.305	30.9651	44.2242	204.821	214.452	28.9129	13.0236	0.676339	0.727823	0.813118	0.929195	0.320642
EAE-Ex7	42dpi	360
EAE-Ex8	42dpi	139
EAE-Ex9	42dpi	19.5
EAE-Ex10	42dpi	289	2	1.70137	18.1783	12.8263	65.1163	31.3027	24.8914	31.3027	31.8308	62.8019	7.24638	11.5942	1.44928	0	6.4915	3.81916	17.7005	16.5764	42.5609	31.5445	0.351265	0.217352	0.189446	0.0897895	55.0489	46.4963	0.01818	0.00270261	0.0207095	0.00347769	1.5535	1.68294	165.667	158.568	130.503	127.086	45.6239	24.6557	173.292	162.027	30.4525	19.1171	0.591564	0.447114	0.609375	0.616554	0.115741
EAE-Ex11	42dpi	220.5	2	1.51161	22.2804	13.5355	82.0513	18.1328	3.00951	35.8026	65.6156	67.1053	0.657895	11.8421	1.97368	2.63158	6.30257	5.07586	20.4853	17.692	43.4151	40.252	0.312843	0.266139	0.150424	0.116214	50.1154	47.067	0.00934137	0.00813308	0.00996413	0.00888505	1.46123	2.45374	146.12	168.2	121.997	134.708	52.2962	31.6653	157.8	172.233	25.9217	20.1692	0.617284	0.481481	0.7075	0.783333	0.111883
EAE-Ex12	42dpi	182.5
Correlation with Clinical Score			1	0.713287	-0.672049	-0.628259	-0.6495	0.368585	0.295798	-0.657214	-0.603454	-0.607999	0.510527	0.359723	0.365666	0.154257	-0.649544	-0.700827	-0.674085	-0.684636	-0.452088	-0.714206	0.54537	0.492737	0.640091	0.105995	0.605858	-0.343192	0.620212	0.0306223	0.621274	0.107082	0.662565	-0.359536	-0.155771	-0.600565	-0.118208	-0.598372	0.498703	-0.682361	-0.137145	-0.61576	0.374637	-0.328808	-0.434661	-0.476455	-0.170754	-0.21132	-0.198319
Correlation with Run Duration			0.713287	1	-0.855284	-0.849891	-0.682626	0.37827	0.284017	-0.603917	-0.478368	-0.767722	0.271204	0.596144	0.444993	0.0068583	-0.85205	-0.819923	-0.87135	-0.877222	-0.603406	-0.795014	0.740219	0.732803	0.891828	0.379476	0.853611	-0.168222	0.899015	0.401277	0.893987	0.459136	0.678035	-0.285349	0.103144	-0.434914	0.158178	-0.383345	0.372224	-0.451558	0.129596	-0.432435	0.498899	-0.289365	-0.30473	-0.315662	0.00544456	-0.116577	0.0513036
Correlation with Rotarod			-0.71576	-0.634829	0.55245	0.53774	0.602114	-0.302136	-0.203064	0.494012	0.429942	0.443769	-0.29562	-0.252198	-0.379712	-0.0605815	0.609187	0.550622	0.532429	0.538847	0.332127	0.556555	-0.420211	-0.472895	-0.52062	-0.076575	-0.513507	0.359117	-0.547377	-0.057983	-0.536704	-0.0811478	-0.563749	0.31407	0.124051	0.558579	0.0956218	0.519996	-0.418515	0.462001	0.104843	0.550027	-0.35242	0.212897	0.428324	0.443347	0.181885	0.255344	0.177092
[truncated: 1 more columns]
